# Supplementary material for: Preparation and application of coconut shell activated carbon immobilized palladium complexes
Source: Royal Society of Chemistry journal article supplement (doi:10.1039/c3cy00460k), 2014-01-01
Supplement: c3cy00460k.pdf [file c3cy00460k.pdf]

# Supporting Information

## Preparation and application of coconut shell activated carbon immobilized palladium complexes

Shuanglong Xiang, Jun Wang, Guoqing Wang, Hong Jiang, Chunrong Xiong\*

Special glass key lab of Hainan province, Hainan University, Haikou 570228, Hainan, P. R.

China

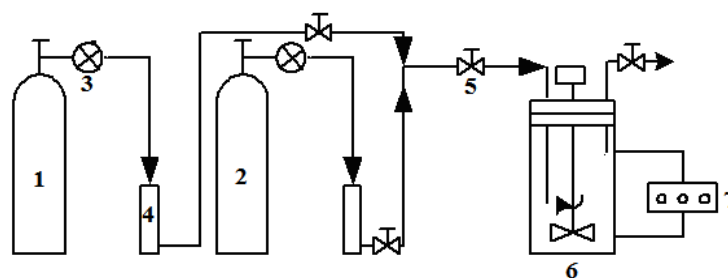

**Fig.S1** Schematic diagram of bath catalytic reaction in a high pressure reaction vessel. 1-CO cylinder; 2-O<sub>2</sub> cylinder; 3-mass flowmeter; 4-dryer; 5-valve; 6-250 mL high-pressure reaction vessel; 7-controller of high-pressure reactor; 8-reactor effluent.

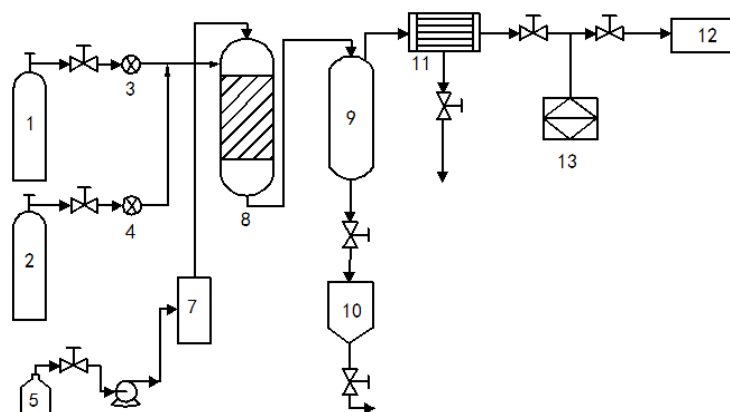

**Fig.S2** Schematic diagram of continuous catalytic reaction in a fixed-bed reactor.  
1-O<sub>2</sub> cylinder; 2-CO cylinder; 3,4-mass flowmeter; 5-raw material tank; 6-metering pump; 7-buffer tank; 8-fixed-bed reactor; 9-gas-liquid separator; 10-bunker; 11-condenser; 12-cistern; 13-gas chromatograph

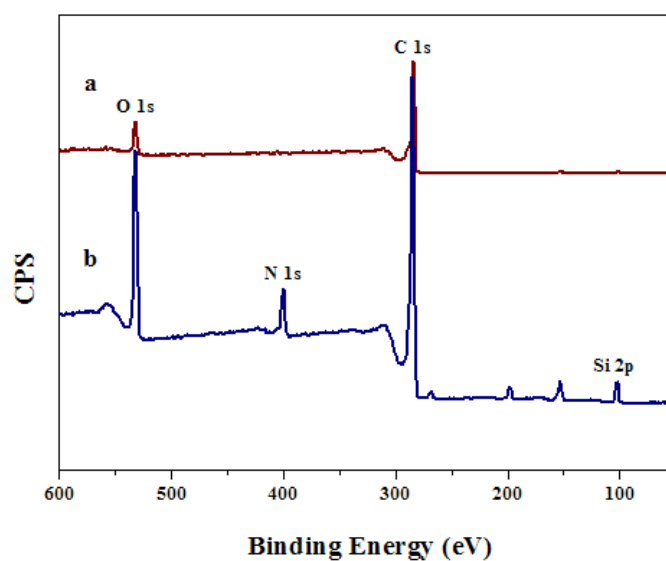

**Fig.S3** XPS spectra of (a) Oxidized CSAC and (b) AEAPTMS silanized CSAC

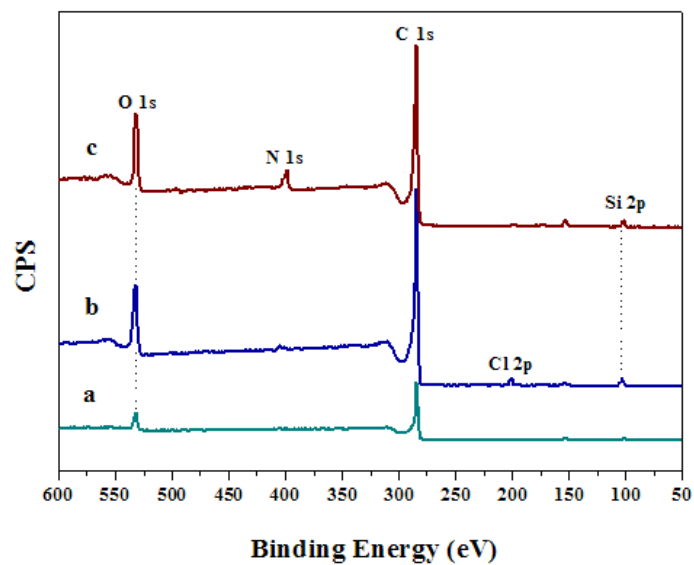

**Fig.S4** XPS spectra of (a) Oxidized CSAC, (b) CMPTCS silanized CSAC and (c) Benzyl malononitrile ligand grafted CSAC.

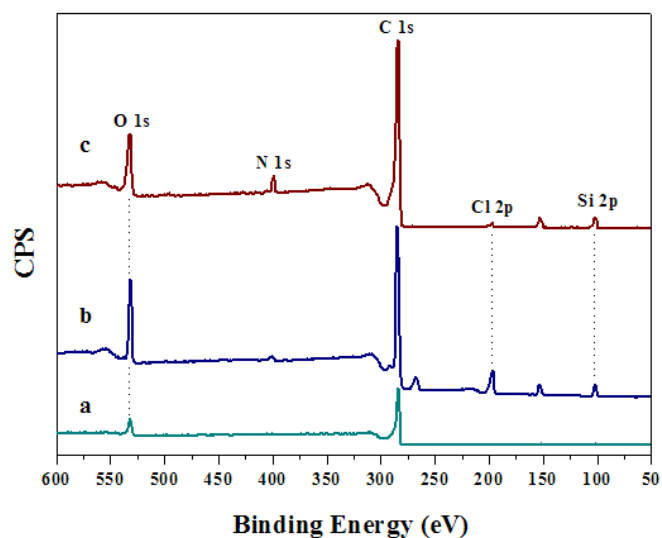

**Fig.S5** XPS spectra of (a) Oxidized CSAC, (b) CPTMS silanized CSAC and (c) Propyl malononitrile grafted CSAC.

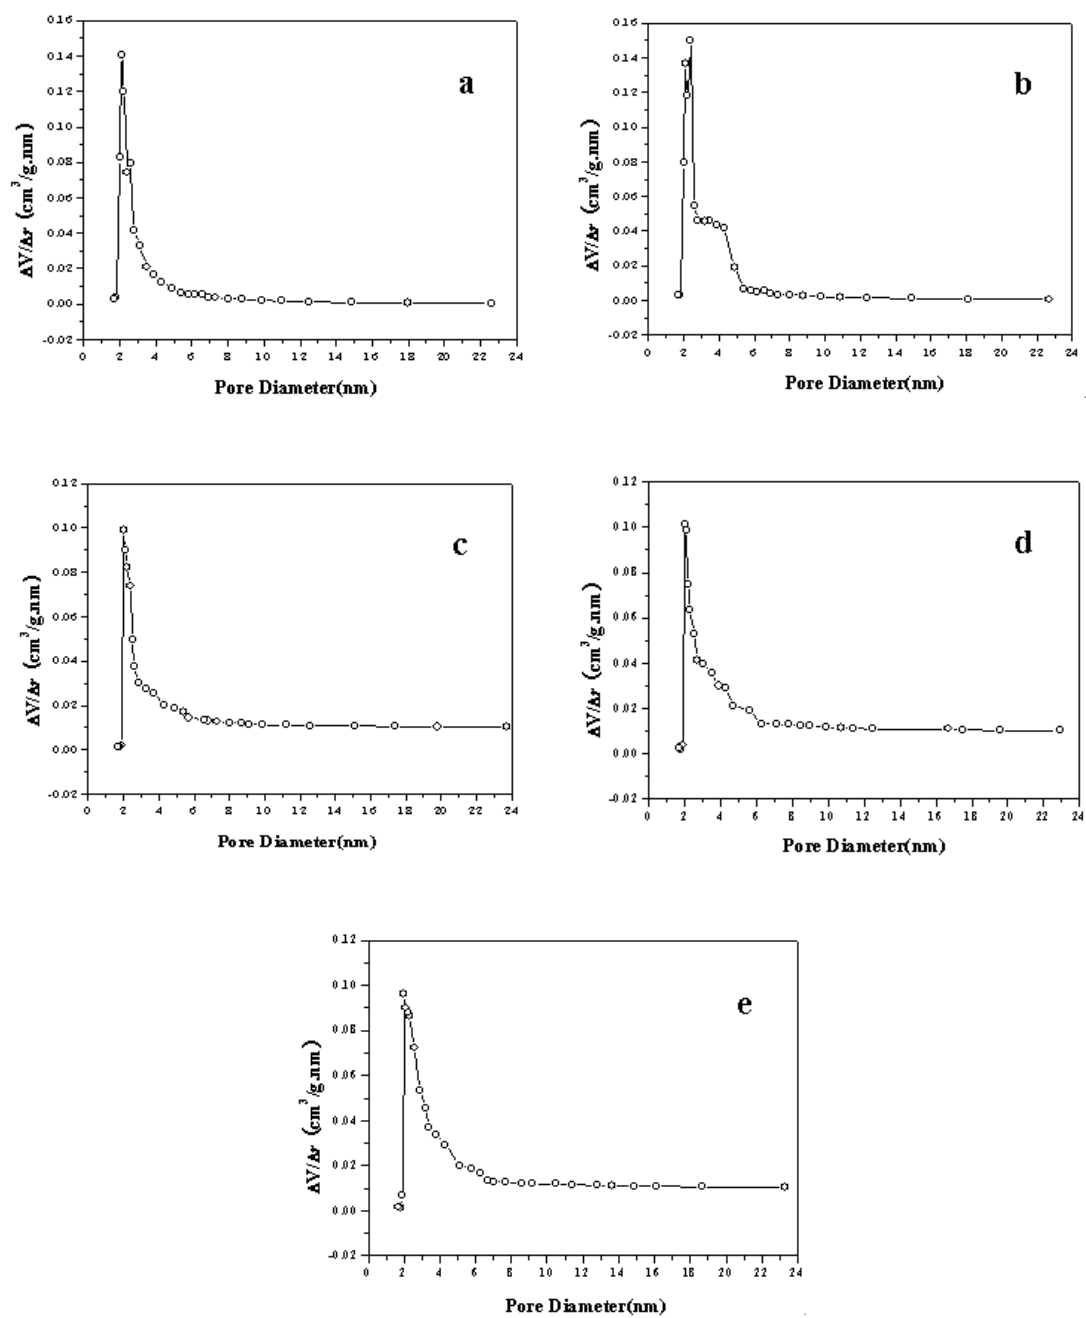

**Fig. S6** Pore size distributions of (a ) Raw CSAC, (b) Oxidized CSAC, (c) Ethylenediamine complexed  $\text{Pd}^{2+}$  catalyst, (d) Benzyl malonitrile complexed  $\text{Pd}^{2+}$  catalyst and (e) Propyl malonitrile complexed  $\text{Pd}^{2+}$  catalyst.

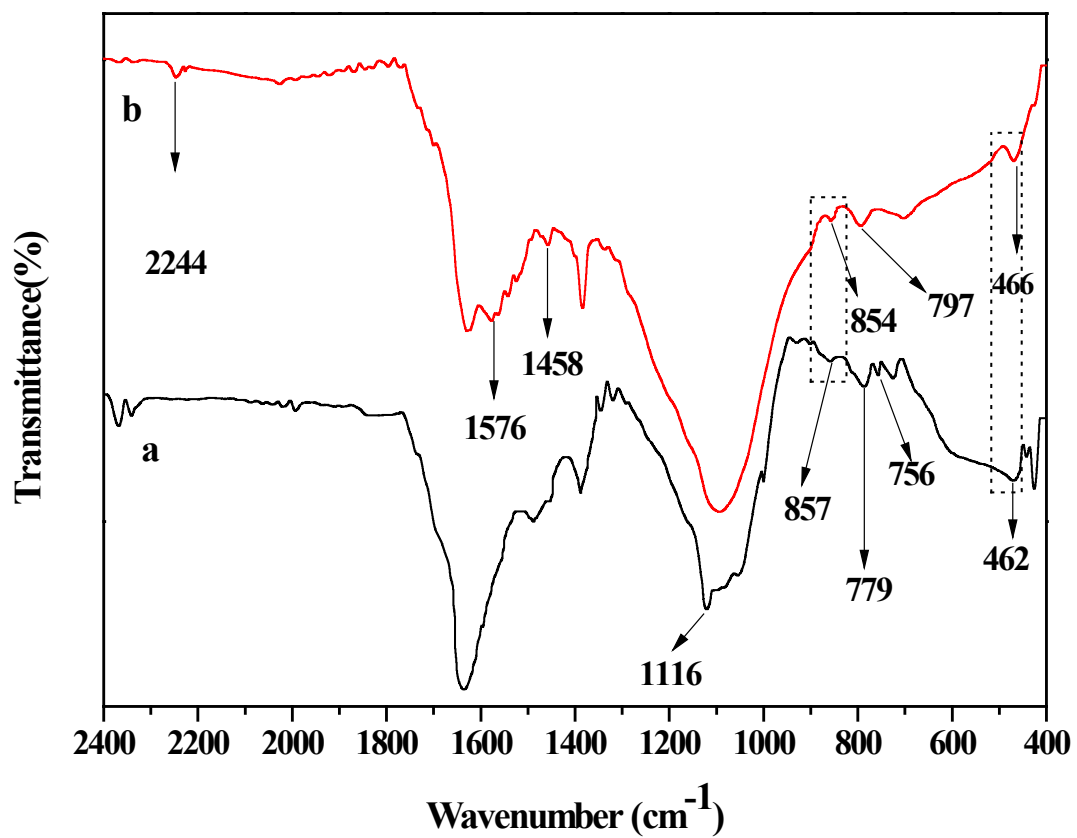

**Fig.S7** FT-IR spectra of catalysts after 75 h catalytic performance in packed bed. (a) Ethylenediamine complexed catalyst, (b) Benzyl malononitrile complexed catalyst
